# Supplementary material for: Effects of COVID-19 Home Confinement on Eating Behaviour and Physical Activity: Results of the ECLB-COVID19 International Online Survey
Source: Nutrients. 2020 May 28;12(6):1583. doi: 10.3390/nu12061583 (PMC7352706; doi:10.3390/nu12061583)
Supplement: Supplementary file 1 [file nutrients-12-01583-s001.pdf]

## Supplementary Material

**Table S1:** Distribution of responses (%) in each item of the diet behavior questionnaire

| Question/responses |                                                                        |        |                 | % of responses (Q1-Q4) |           |                  |        | % of responses (Q5) |       |       |      |                |
|--------------------|------------------------------------------------------------------------|--------|-----------------|------------------------|-----------|------------------|--------|---------------------|-------|-------|------|----------------|
| Question number    | Text                                                                   | Period | Mean $\pm$ SD   | Never                  | Sometimes | Most of the time | Always | 1 ou<br>2           | 3     | 4     | 5    | more<br>than 5 |
| Q1                 | How likely are you to have an unhealthy diet/food                      | Before | 2.18 $\pm$ 0.02 | 12.23                  | 63.13     | 18.43            | 6,21   | N/A                 |       |       |      |                |
|                    |                                                                        | During | 2.27 $\pm$ 0.03 | 17.38                  | 48.42     | 23.30            | 10,89  |                     |       |       |      |                |
| Q2                 | How often have you found yourself being eating out of control          | Before | 1.80 $\pm$ 0.02 | 34.19                  | 53.77     | 9.74             | 2,29   |                     |       |       |      |                |
|                    |                                                                        | During | 2.04 $\pm$ 0.03 | 35.82                  | 34.19     | 20.44            | 9,55   |                     |       |       |      |                |
| Q3                 | How likely are you to have a snack between meals or a late-night snack | Before | 2.08 $\pm$ 0.02 | 19.77                  | 59.41     | 13.85            | 6,97   |                     |       |       |      |                |
|                    |                                                                        | During | 2.40 $\pm$ 0.03 | 14.71                  | 45.56     | 24.36            | 15,38  |                     |       |       |      |                |
| Q4                 | Do you engage in binge alcohol drinking                                | Before | 1.15 $\pm$ 0.01 | 87.68                  | 10.12     | 1.81             | 0,38   |                     |       |       |      |                |
|                    |                                                                        | During | 1.08 $\pm$ 0.01 | 93.22                  | 5.35      | 1.24             | 0,19   |                     |       |       |      |                |
| Q5                 | How many main meals do you eat a day                                   | Before | 1.79 $\pm$ 0.02 | N/A                    |           |                  |        | 35.15               | 55.11 | 6.59  | 2.39 | 0.76           |
|                    |                                                                        | During | 2.05 $\pm$ 0.03 |                        |           |                  |        | 29.99               | 46.42 | 14.52 | 6.30 | 2.77           |
